# Supplementary material
Source: Springer Nature journal article supplement (https://www.springermedizin.de/resource/supplementary/12879_2011_1616_MOESM6_ESM.pdf/9442942)

Funnel plot with pseudo 95% confidence limits

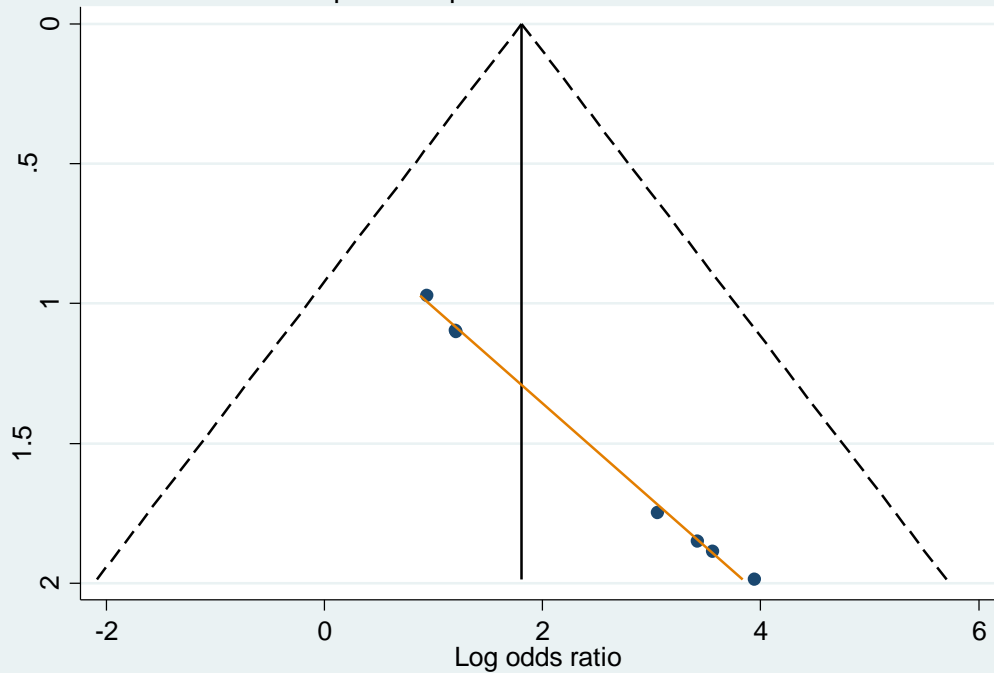

Supplement: MOESM6 [file 9442942]
